# Supplementary material for: A dynamic matrix potentiates mesenchymal stromal cell paracrine function via an effective mechanical dose
Source: Royal Society of Chemistry journal article supplement (doi:10.1039/d0bm01012j), 2020-01-01
Supplement: d0bm01012j1.pdf [file d0bm01012j1.pdf]

## Supporting Information

### **Dynamic matrix potentiates mesenchymal stromal cells paracrine function *via* effective mechanical dose**

Chuanchuan Lin <sup>a</sup>, Kun Xu <sup>a</sup>, Ye He <sup>a</sup>, Bailong Tao <sup>a</sup>, Zhang Yuan <sup>a</sup>, Ke Li <sup>a</sup>,  
Xuemin Li <sup>c</sup>, Zengzilu Xia <sup>a</sup>, Kaiyong Cai <sup>a, b\*</sup>

<sup>a</sup> Key Laboratory of Biorheological Science and Technology, Ministry of Education College of Bioengineering, Chongqing University, Chongqing 400044, China

<sup>b</sup> Chongqing Key Laboratory of Soft-Matter Material Chemistry and Function Manufacturing, Chongqing 400044, China

<sup>c</sup> Innovation Drug Research Centre, School of Pharmaceutical Sciences, Chongqing University, Chongqing 401331, China

\* Corresponding author: Prof. Kaiyong Cai

College of Bioengineering

Chongqing University

Chongqing 400044

China

Tel: +86-23-65111802

Fax: +86-23-65102877

E-mail: [kaiyong\\_cai@cqu.edu.cn](mailto:kaiyong_cai@cqu.edu.cn)

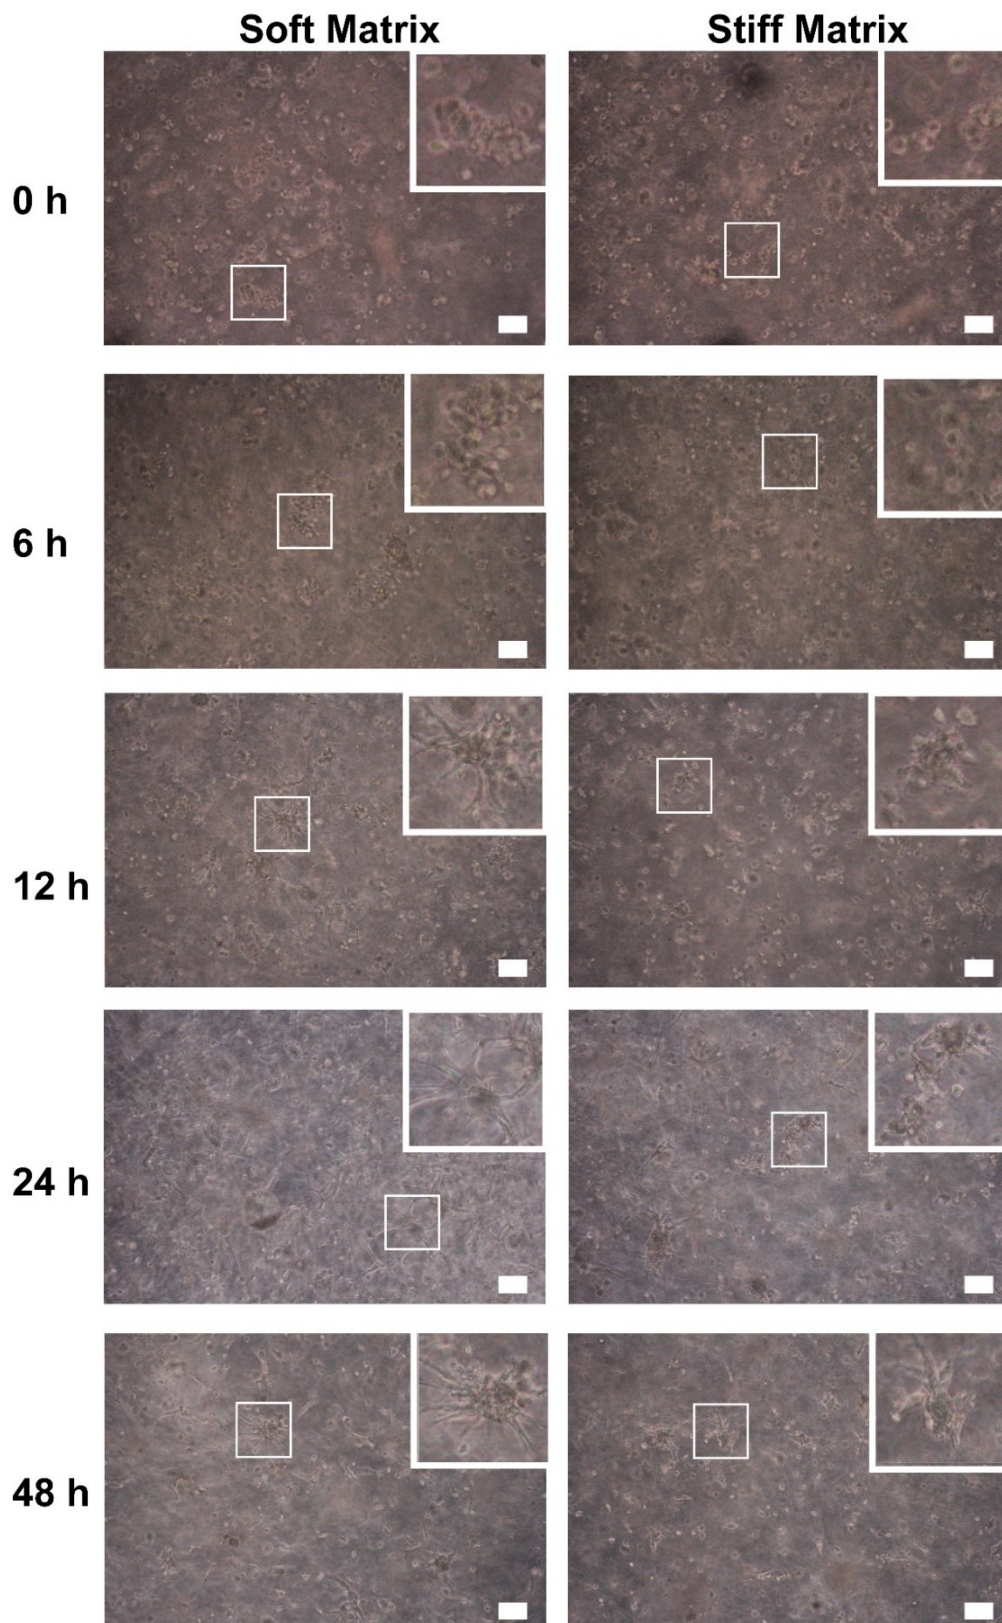

**Figure S1.** Spreading rate of MSCs in soft or stiffening hydrogel (scale bar = 100  $\mu\text{m}$ ).

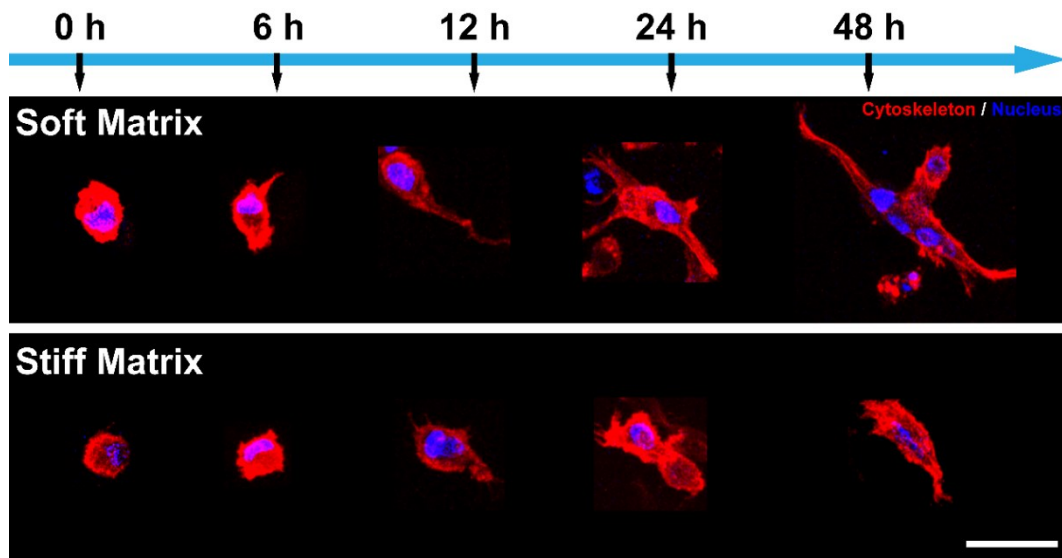

**Figure S2.** Spreading rate of MSCs in soft or stiffening hydrogel (red: cytoskeleton; blue: nuclei, scale bar = 20  $\mu\text{m}$ ).

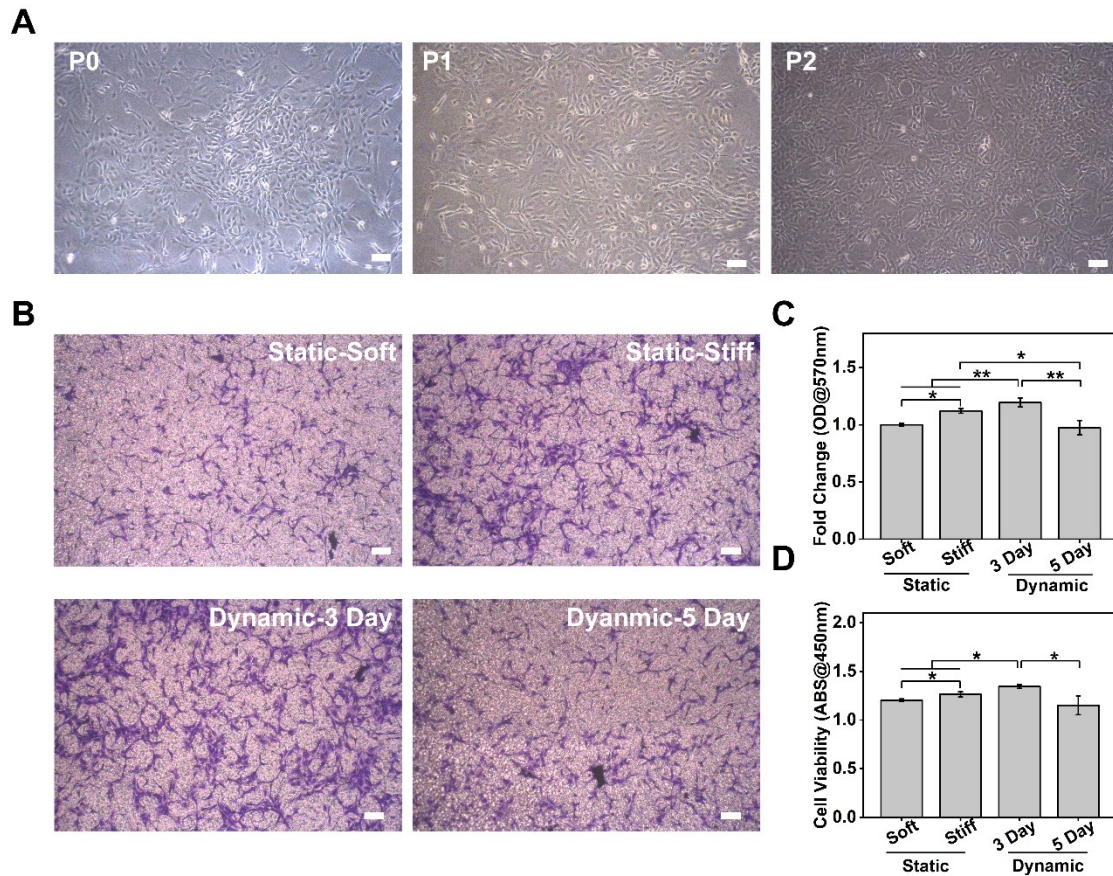

**Figure S3.** The effects of conditioned medium (CM) of MSCs on (A) The morphology of SD rat thoracic aorta endothelial cells; (B - D) the effects of conditioned medium (CM) of MSCs on SD rat thoracic aorta endothelial cells (B & C) migration and (D) proliferation. (Scale bar = 100  $\mu$ m, n = 3, \* $p$  < 0.05, \*\* $p$  < 0.01) All data was shown as mean  $\pm$  SD.

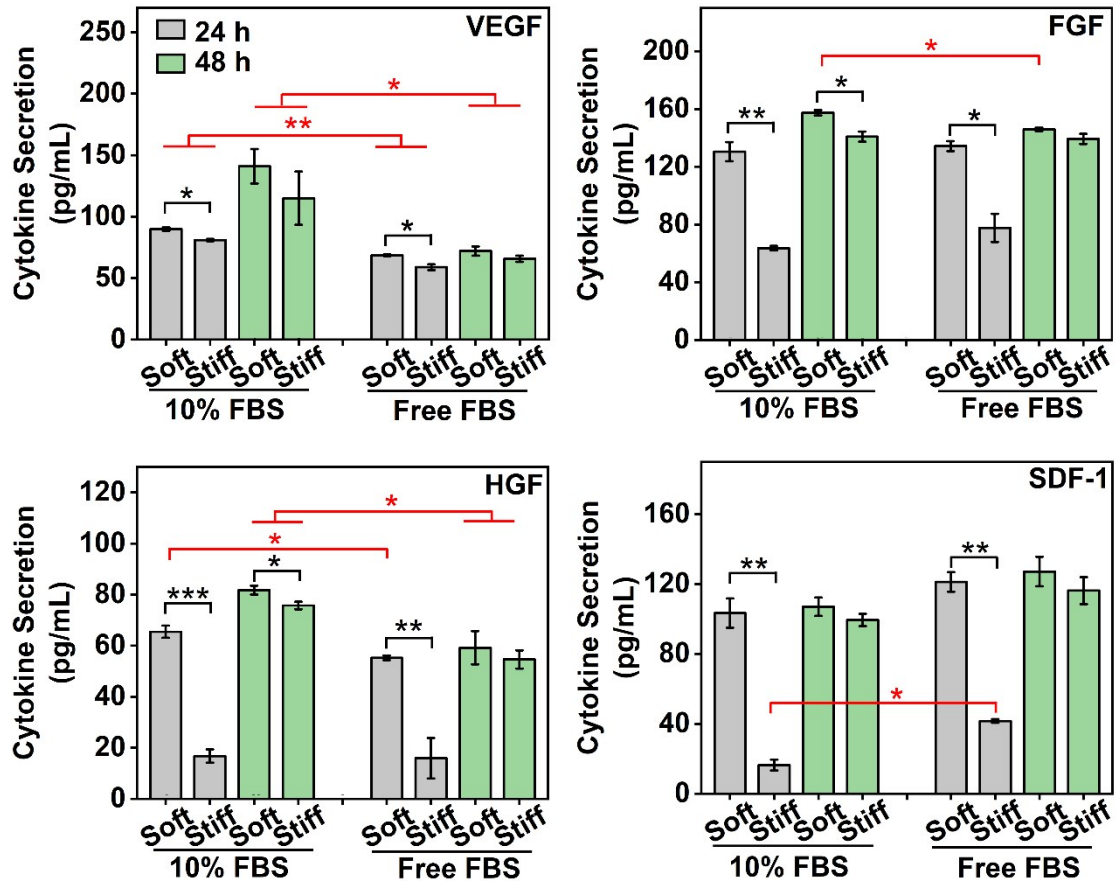

**Figure S4.** Paracrine factors of MSCs in soft or stiffening hydrogel after 24 h / 48 h under 10 % FBS medium or free FBS medium (n=3, \* $p < 0.05$ , \*\* $p < 0.01$ , \*\*\* $p < 0.001$ ). All data was shown as mean  $\pm$  SD.

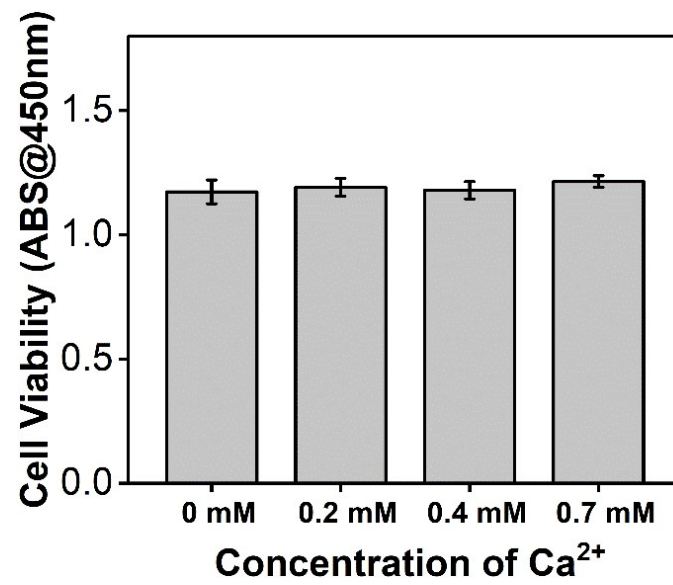

**Figure S5.** Cell viability of MSCs which treated with different Ca<sup>2+</sup>. All data was shown as mean  $\pm$  SD.

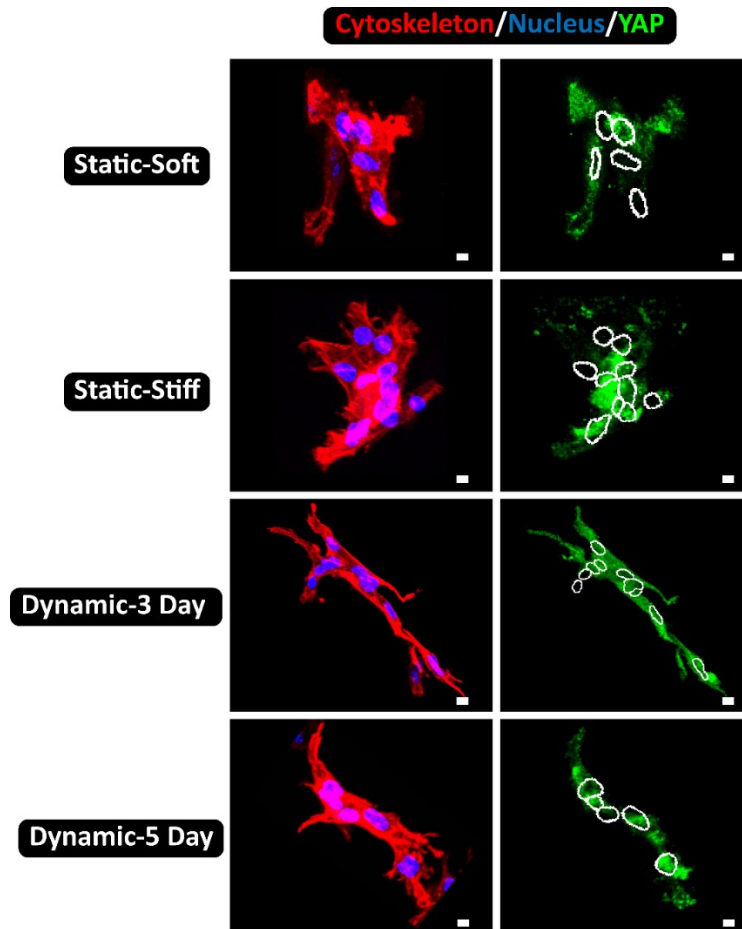

**Figure S6.** The morphology or YAP location of cluster cells in hydrogel.

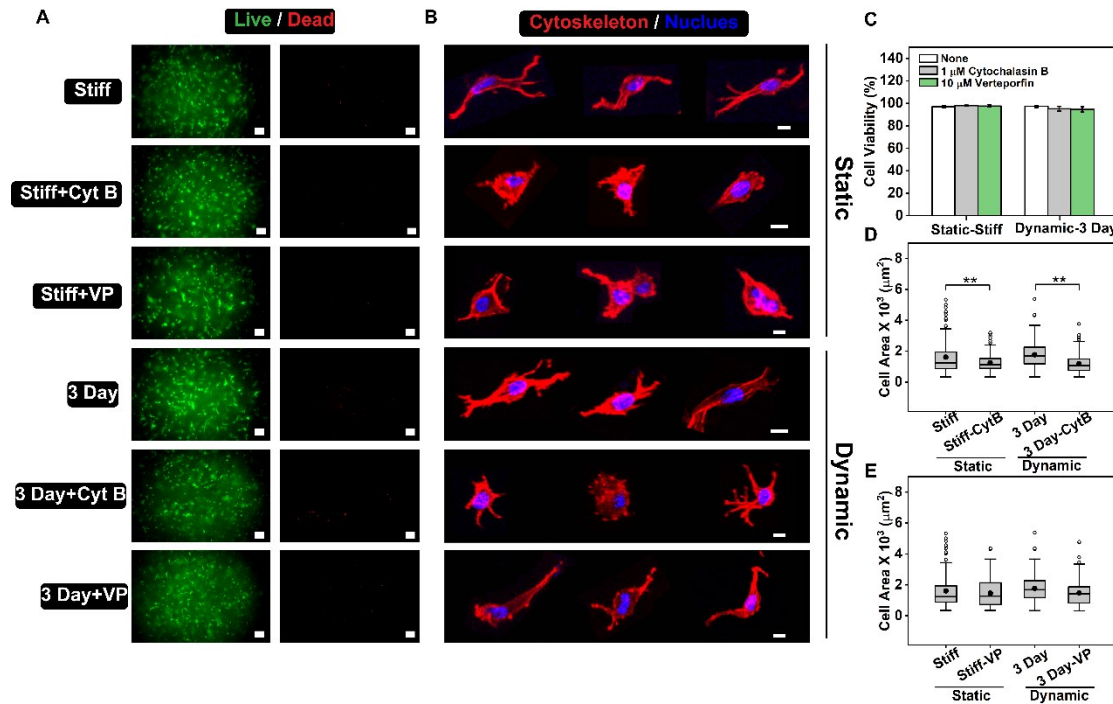

**Figure S7.** Cell morphology and viability of MSCs cultured in SA hydrogels for 7 days with inhibitors treatment. (A) Live / dead staining of MSCs (scale bar = 100  $\mu$ m, green - live cells, red - dead cells). (B) The cytoskeleton staining of MSCs cultured in hydrogels (scale bar = 5  $\mu$ m, red - cytoskeleton, blue - nucleus). (C) Cell viability of MSCs (calculated 5 scopes in every sample). (D & E) Cell shape index of single MSC ( $n = 60$ ,  $**p < 0.01$ ). All data was shown as mean  $\pm$  SD.



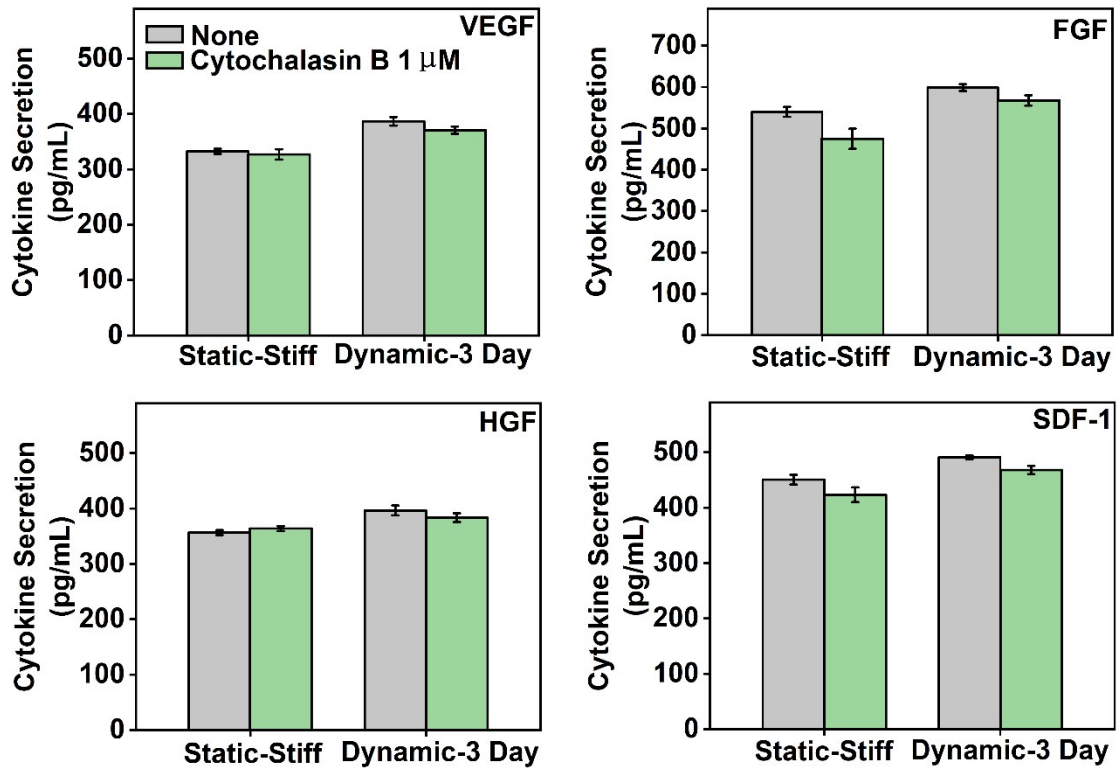

**Figure S8.** Inhibited the polymerization of F-actin cannot enough change the paracrine cytokines of MSCs in hydrogels (n = 3). All data was shown as mean  $\pm$  SD.

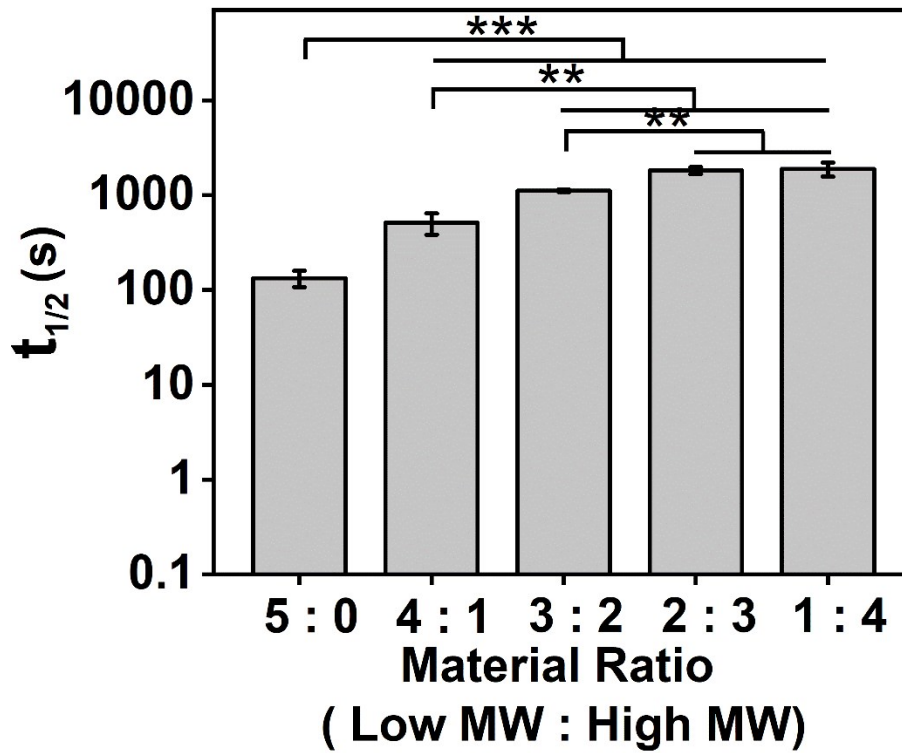

**Figure S9.** MW of SA can affect the stress relaxation of SA hydrogels ( $n = 3$ ,

\*\* $p < 0.01$ , \*\*\* $p < 0.001$ ). All data was shown as mean  $\pm$  SD.

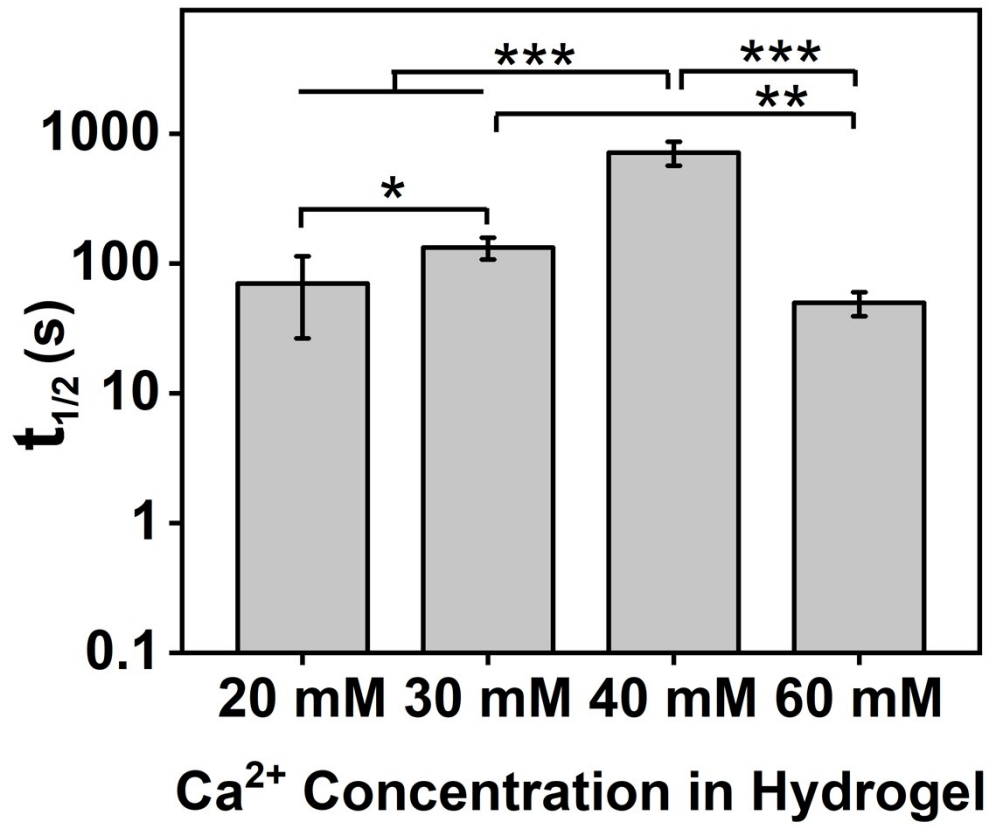

**Figure S10.** Correlation between Ca<sup>2+</sup> concentration and stress relaxation (n = 3, \**p* < 0.05, \*\**p* < 0.01, \*\*\**p* < 0.001). All data was shown as mean ± SD.

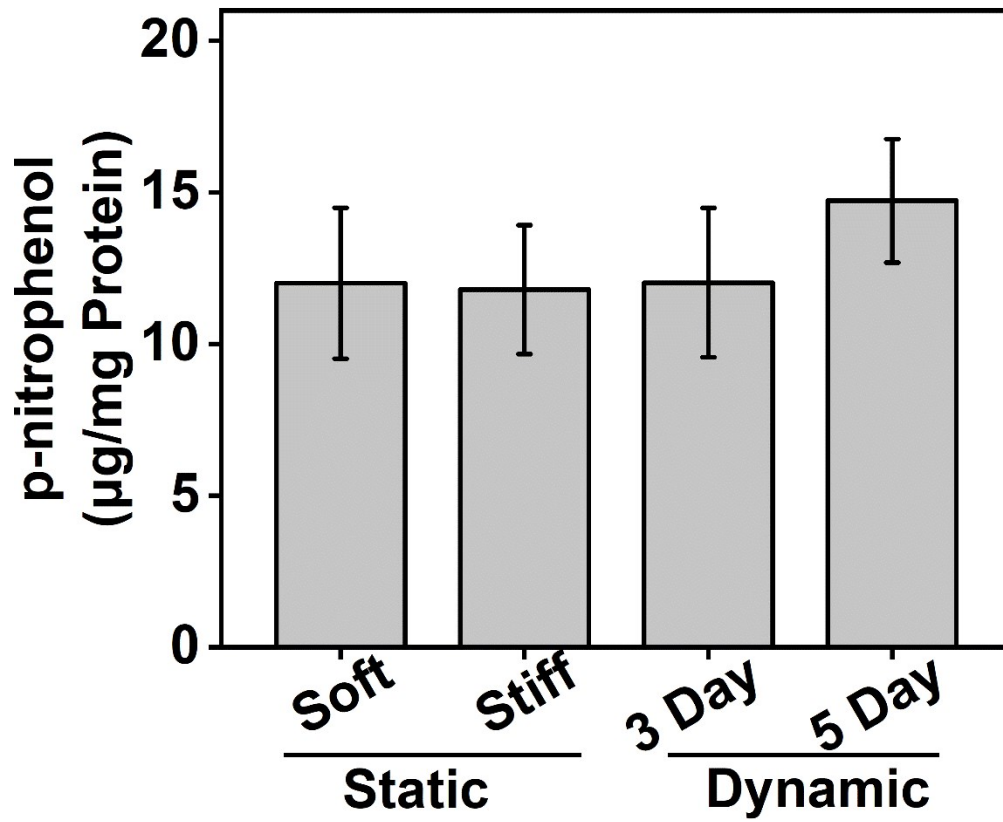

**Figure S11.** The ALP expression of MSCs in hydrogels after culturing 7 days

(n = 5). All data was shown as mean  $\pm$  SD.

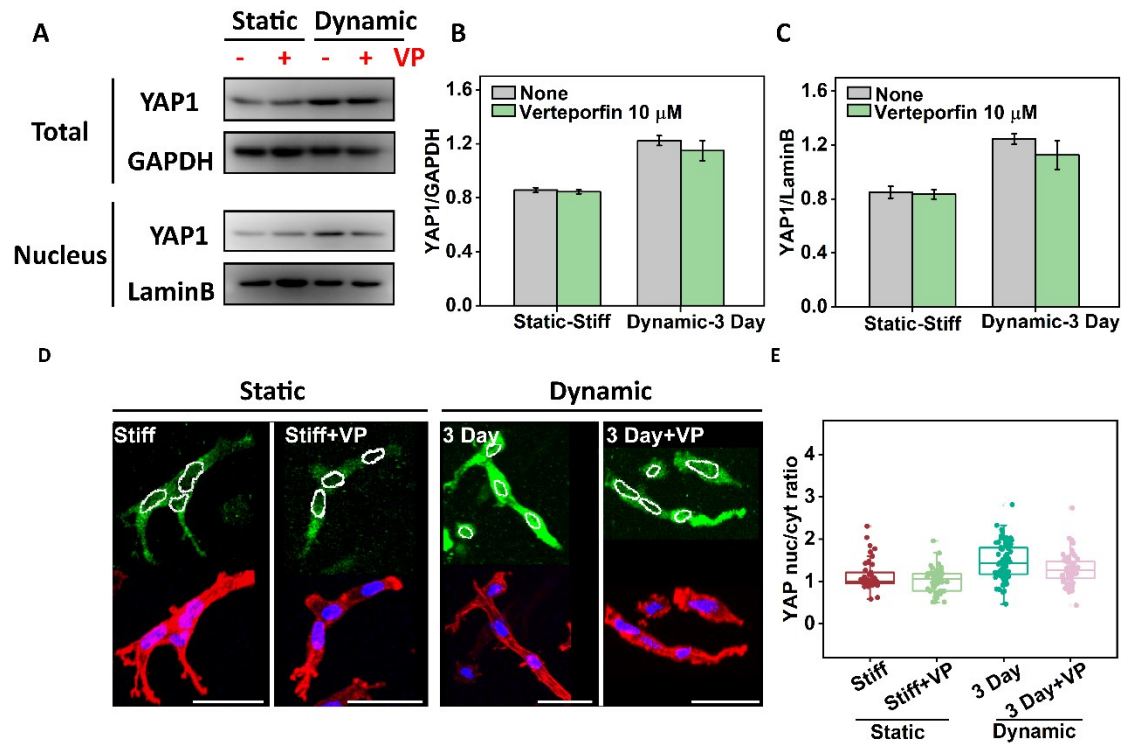

**Figure S12.** The effects of verteporfin on the expression and activation of YAP.

(A-C) Western blotting analysis of the expression of YAP in MSCs in hydrogel

(n = 3). (D-E) Immunofluorescent staining of YAP (green), cytoskeleton (red)

and nuclei (blue) in MSCs in hydrogel (n =60 single MSCs, scale bar = 30  $\mu$ m).

**Table S1.** The sequence of primers used in RT-PCR.

| <b>Gene</b>  | <b>5'-3'</b> | <b>Primers</b>               |
|--------------|--------------|------------------------------|
| <i>VEGFA</i> | Sense        | 5'-CTTCAAGCCGTCCTGTGTGC-3'   |
|              | Anti-sense   | 5'-GGCTCACAGTGATTTTCTGGCT-3' |
| <i>FGF</i>   | Sense        | 5'-AAGAGCGACCCACACGTCAA-3'   |
|              | Anti-sense   | 5'-CTGCCCAGTTCGTTTCAGTGC-3'  |
| <i>HGF</i>   | Sense        | 5'-CCCCATGAACACAGCTTTTTG-3'  |
|              | Anti-sense   | 5'-GCTTTCACCGTTGCAGGTCA-3'   |
| <i>IGF</i>   | Sense        | 5'-CTGGGACTTCTGAGTCTTGG-3'   |
|              | Anti-sense   | 5'-GGGCATTGTGGATGAGTG-3'     |
| <i>SDF-1</i> | Sense        | 5'-ATGCCCTGCCGATTCTTT-3'     |
|              | Anti-sense   | 5'-GTTGTTGCTTTTCAGCCTTGC-3'  |
| <i>GAPDH</i> | Sense        | 5'-TGCATTGTTGCGGTCCAC-3'     |
|              | Anti-sense   | 5'-GGCATTGCTCTCAATGACAA-3'   |
